# Supplementary material for: Piezo1 mechanosensing regulates integrin-dependent chemotactic migration in human T cells
Source: eLife. 2024 Feb 23;12:RP91903. doi: 10.7554/eLife.91903 (PMC10942591; doi:10.7554/eLife.91903)
Supplement: Source data 1. [file elife-91903-data1.xlsx]

## Sheet: 1A
GFP (-)				GFP (+)
Mean Squared Displacement (MSD)								Time (Mins)
Mean	SEM	N		Mean	SEM	N
0	0	236		0	0	49		0
3.75828	0.402437	236		2.13363	0.359773	49		0.5
9.13803	1.47653	236		7.31719	1.25496	49		1
13.4357	2.18042	236		10.4222	1.3354	49		1.5
17.4704	2.23837	236		12.3399	1.79545	49		2
22.4971	2.65086	236		12.8264	1.81638	49		2.5
26.4462	2.61686	236		15.3711	2.01225	49		3
29.998	2.86879	236		19.7383	2.81954	49		3.5
34.8114	2.90319	236		22.1833	3.57137	49		4
39.3327	3.60455	236		26.2761	4.83466	49		4.5
42.5072	3.8587	236		27.1732	4.88895	49		5
47.5444	4.38975	236		30.9353	5.57831	49		5.5
55.0137	5.08228	236		30.8864	4.61654	49		6
59.1663	5.65651	236		36.5707	4.54892	49		6.5
65.4882	6.76318	236		39.0433	5.39251	49		7
72.8022	7.84799	236		44.8811	5.86307	49		7.5
78.7699	7.90349	236		53.6421	7.23151	49		8
82.9149	8.32889	236		59.807	8.0852	49		8.5
91.8876	10.47	236		64.7925	9.00215	49		9
96.1227	9.99156	236		66.7627	10.2057	49		9.5
103.912	10.143	236		69.7916	10.2437	49		10
108.748	10.9645	236		75.0777	11.7688	49		10.5
114.862	11.5136	236		77.9905	12.4395	49		11
122.21	13.2648	236		81.5409	12.9605	49		11.5
134.75	14.9801	236		90.7741	14.8542	49		12

## Sheet: 1D
% Proportion Migration
Control		Piezo1 KD
Untreated	CCL19	Untreated	CCL19
0.19	0.572	0.06	0.382
0.046	0.608	0.03	0.338
0.008889	0.406667	0.008889	0.322222
0.00375	0.50625	0.005	0.27

## Sheet: 1E
% Proprotion Migration
Control		Piezo1 KD
Untreated	SDF1α	Untreated	SDF1α
0.012	0.43	0.002	0.328
0.01	0.318	0.004	0.251
0.02	0.386	0.016	0.3
0.016	0.338	0.008	0.27
0.004	0.346	0.006	0.278

## Sheet: 1G
Piezo1 Polarity
Not Treated	CCL19
0.101652	0.050064
0.045822	0.256356
0.12342	0.22743
0.261103	0.184844
0.042055	0.063351
0.003211	0.186715
0.049589	0.019333
0.178582	0.145875
0.045925	0.149182
0.021788	0.106934
0.146709	0.174096
0.010373	0.205844
0.120095	0.047582
0.102402	0.087646
0.081934	0.054195
0.249713	0.057776
0.054558	0.010026
0.038929	0.227184
0.064826	0.041169
0.068071	0.072525
0.031291	0.182613
0.090976	0.154083
0.011996	0.027973
0.126115	0.121622
0.00152	0
0.067717	0
0.029356	0.333167
0.072582	0.001979
0.016982	0.056744
0.144847	0.149039
0.128907	0.197182
0.153165	0.201058
0.177582	0.917791
0.064002	0.109369
0.251237	0.24443
0.231022	0.382588
0.124434	0.205073
0.077502	0.233155
0.116853	0
0.183257	0.0715
0.102836	0.051404
0.232795
0.030244	0.067571
0.099892	0.028315
0.060644	0.278344
0.174551	0.112295
0.171758	0.010725
0.09615	0.081565
0.019106	0.212854
0.022979	0.003155
0.051088	0.077043
0.053672	0.00764
0.051328	0.07325
0.038711	0.03511
0.039421	0.144077
0.063874	0.00364
0.089254	0.038008
0.014733	0.110986
0.036071	0.08056
0.020557	0.073876
0.124301	0.074156
0.133982	0.098564
0.094947	0.13348
0.119508	0.02425
0.014271	0.031135
0.002312	0.032964
0.087565	0.045468
0.106861	0.087625
0.009985	0.005403
0.005684	0.098855
0.137357	0.18432
0.084626	0.000975
0.110163	0.225148
0.02747	0.0609
0.014616	0.155459
0.013348	0.051886
0.049899	0.220002
0.026631	0.037731
0.03559	0.008559
0.076623	0.152849
0.025252	0.016755
0.162989	0.137131
0.066754	0.137104
0.169248	0.114221
0.040523	0.046384
0.053645	0.047553
0.057306	0.005754
0.119401	0.108245
0.053213	0.113236
0.04116	0.001912
0.057927	0.006091
0.035984	0.056387
0.012883	0.01688
0.085625	0.051301
0.043467	0.019958
0.02759	0.014557
0.077739	0.055387
0.062368	0.069718
0.063373	0.050105
0.094295	0.027548
0.12375	0.104482
0.025099	0.154904
0.004962	0.145945
0.039778	0.0754
0.015286	0.085246
0.021505	0.188229
0.052449	0.003366
0.057121	0.022141
0.087534	0.019544
0.061365	0.032704
0.042208	0.050074
0.025702	0.144899
0.027158	0.179404
0.028301	0.052425
0.01331	0.111345
0.050294	0.1999
0.094702	0.088156
0.205144	0.073399
0.067817	0.231718
0.058986	0.010196
0.075931	0.048547
0.128536	0.01357
0.06668	0.080518
0.094367	0.019239
0.070004	0.044213
0.060519	0.111033
0.010725	0.028279
0.006191	0.134308
0.081236	0.116317
0.008718	0.011388
0.066355	0.107616
0.073364	0.083133
0.077604	0.114542
0.006253	0.119595
0.005643	0.096255
0.119237	0.030206
0.05962	0.099902
0.019953	0.057077
0.007054	0.573177
0.02156	0.01027
0.072921	0.135229
0.087297	0.007968
0.011444	0.024652
0.010113	0.00888
0.062552	0.037754
0.068653	0.006882
0.006866	0.225786
0.026142	0.021378
0.041955	0.164883
0.151028	0.083495
0.088563	0.082229
0.06973	0.006422
0.063379	0.043603
0.013274	0.036895
0.011467	0.003953
0.090152	0.12754
0.034686	0.041161
0.016716	0.017512
0.076179	0.054673
0.102057	0.027386
0.068891	0.00111
0.011386	0.093592
0.121216	0.002206
0.049801	0.023228
0.101409	0.256013
0.060466	0.126408
0.037037	0.021332
0.180638	0.010953
0.07224	0.016519
0.018503	0.002602
0.009901	0.050005
0.015117	0.119507
0.00495	0.019333
0.009196	0.003241
0.012648	0.110479
0.006331	0.019154
0.129025	0.010757
0.067634	0.047545
0.060173	0.023118
0.004535	0.096972
0.175185	0.078442
0.058896	0.006139
0.013597	0.073066
0.053712	0.083587
0.021484	0.54965
0.072879	0.169947
0.100899	0.070296
0.034603	0.070525
0.077478	0.033292
0.091551	0.064477
0.02566	0.090801
0.074601	0.149631
0.050849	0.010187
0.034708	0.1312
0.014621	0.005341
0.034323	0.057855
0.002418	0.171206
0.115151	0.084028
0.083338	0.028898
0.078432	0.082192
0.134479	0.031822
0.025652	0.034846
0.010897	0.091259
0.052188	0.032508
0.007132	0.085149
0.058173	0.029208
0.070556	0.196598
0.078896	0.027216
0.005174	0.01369
0.16825	0.057584
0.060109	0.080167
0.077488	0.076397
0.009535	0.003547
0.334698	0.057725
0.044436	0.032306
0.021245	0.14028
0.062224	0.148901
0.005276	0.202178
0.139909	0.034503
0.015524	0.146139
0.020022	0.011263
0.132724	0.057678
0.045596	0.015196
0.042423	0.06195
0.022325	0.10052
0.010899	0.167432
0.004934	0.024979
0.057025	0.087792
0.01414	0.060661
0.016242	0.079314
0.061537	0.008514
0.051282	0.01969
0.041681	0.199168
0.043112	0.001114
0.076239	0.054812
0.046384	0.017348
0.000828	0.513486
0.049038	0.014083
0.122803	0.725262
0.135853	0.117804
0.016644	0.04787
0.023977	0.281512
0.044399	0.053277
0.113963	0.097318
0.038514	0.000241
0.108857	0.114252
0.034264	0.055613
0.040092	0.054899
0.064758	0.078822
0.044114	0.01889
0.096273	0.026609
0.006234	0.090671
0.026912	0
0.002934	0.052992
0.010581	0.05282
0.036201	0.037796
0.126083	0.699051
0.014913	0.036309
0.060745	0
0.011864	0.061719
0.052312	0.024482
0.125207	0.068909
0.060227	0.062047
0.028576	0.02658
0.028085	0.113788
0.075155	0.07734
0.059588	0.010721
0.123952	0.10783
0.055156	0.397799
0.044577	0.191589
0.002801	0.291594
0.038082	0.119572
0.002556	0.022762
0.139836	0.319196
0.028278	0.090228
0.045329	0.278605
0.083965	0.196586
0.020836	0.141952
0.045566	0.197749
0.062181	0.201227
0.021805	0.078563
0.090778	0.109422
0.014054	0.232708
0.117958	0.046044
0.007738	0.012649
0.090679	0.212549
0.005824	0.06195
0.107559	0.197301
0.181626	0.007185
0.071089	0.329365
0.096668	0.010348
0.051218	0.14194
0.027362	0.249754
0.009711	0.002245
0.038032	0.122323
0.023452	0.147379
0.026689	0.287927
0.038638	0.079955
0.034657	0.014029
0.045634	0.032912
0.019954	0.149345
0.082998	0.296649
0.115348	0.001387
0.003473	0.152492
0.009695	0.074956
0.028147	0.060885
0.014555	0.201599
0.116584	0.173799
0.01313	0.15175
0.152551	0.144875
0.011838	0.236384
0.004473	0.590859
0.064639	0.167938
0.040697	0.367974
0.040243	0.321135
0.009325	0.06539
0.005218	0.037088
0.011389	0.190294
0.077666	0.098752
0.080933	0.147537
0.027685	0.185804
0.019483	0.374615
0.023018	0.360056
0.057009	0.061544
0.05991	0.235498
0.026438	0.241954
0.013331	0.262741
0.025309	0.367086
0.109919	0.356763
0.076137	0.367513
0.077361	0.103948
0.022985	0.240909
0.003509	0.304404
0.01034	0.322563
0.067716	0.242128
0.057306	0.284336
0.060411	0.188721
0.079222	0.278885
0.157067	0.148356
0.100965	0.017853
0.033968	0.301708
0.043076	0.26754
0.036158	0.197637
0.066423	0.073941
0.037808	0.956558
0.048567	0.347712
0.037123	0.110121
0.050031	0.25308
0.057973	0.005578
0.00912	0.42778
0.079914	0.093514
0.032777	0.571938
0.108478	0
0.120279	0.257056
0.060005	0.197964
0.043388	0.188737
0.160124	0.044124
0.061126	0.029311
0.110008	0.002111
0.006913	0.224136
0.130463	0
0.084262	0
0.129025	0.185192
0.065819	0.175204
0.117704	0
0.020145	0.055831
0.015388	0.229437
0.066845	0.48371
0.112487	0.375188
0.002811	0.190436
0.0442	0.419886
0.145225	0.027311
0.009905	0.1548
0.036343	0.284711
0.165562	0.196356
0.0325	0.071335
0.042342	0.123632
0.128079	0.348487
0.162546	0.015924
0.130906	0.247514
0.056645	0.015631
0.01329	0.043681
0.02088	0.665238
0.059419	0.094282
0.125302	0.440365
0.166758	0.662245
0.008088	0.041633
0.117195	0.458321
0.05329	0
0.031926	0.229106
0.040821	0.133577
0.005239	0.061048
0.019672	0.058536
0.088293	0.262898
0.08219	0.153089
0.10855	0.063338
0.039222	0.400597
0.059409	0.017186
0.011228	0
0.027391	0
0.245651	0.855651
0.148517	0
0.048778	0
0.042942	0
0.020815	0
0.001618	0.198077
0.01328	0.096187
0.028044	0.078353
0.055777	0.03268
0.03911	0.016757
0.059845	0.066594
0.013239	0.145637
0.077973	0.026321
0.063877	0.04271
0.050787	0.152973
0.010624	0.06407
0.027697	0.068703
0.018145	0.315518
0.002124	0.105757
0.041501	0.37164
0.001305	0.486073
0.067627	0.091014
0.043542	0.397137
0.078868	0.769374
0.074346	0.0189299
0.024844	0.0324063
0.041037	0.0322459
0.019753	0.0731698
0.038026	0.106395
0.007164	0.0547252
0.117714	0.0194225
0.060557	0.142067
0.004612	0.00147056
0.035837	0.032869
0.05962	0.0270808
0.014107	0.0322495
0.036468	0.0666469
0.081936	0.0799641
0.05132	0.125511
0.011859	0.00489314
0.070656	0.135262
0.007736	0.198343
0.114754	0.039567
0.015634	0.0366441
0.029052	0.0467184
0.022225	0.0152226
0.028512	0.0476955
0.078669	0.177011
0.009346	0.0234809
0.103261	0.0726617
0.00552	0.0184387
0.068345	0.0378238
0.040563	0.126157
0.047175	0.409027
0.198604	0.0318015
0.111158	0.238831
0.179996	0.422896
0.06394	0.422151
0.03759	0.0434404
0.026293	0.417678
0.007232	0.500099
0.060442	0.687583
0.010644	0
0.021161	0.605047
0.100488	0.338481
0.066016	0.513517
0.066158	0.0665044
0.01502	0.0013876
0.077157	0.0491493
0.001214	0.704145
0.016082	0.100132
0.087596	0.0664485
0.042726	0.10273
0.010639	0.203271
0.020694	0.0747951
0.064725	0.0705358
0.036156	0.0479724
0.085604	0.0390268
0.072257	0.0629491
0.105985	0.201542
0.012157	0.0131512
0.032368	0.0207664
0.056897	0.125394
0.075029	0.183727
0.023931	0.268632
0.009953	0.107935
0.07982	0.141986
0.013821	0.124515
0.083953	0.322502
0.067623	0.46297
0.008816	0.262928
0.01509	0.00764546
0.009975	0.00641569
0.240217	0.571413
0.000671	0.0485244
0.092033	0.592155
0.047431	0
0.039492	0.228672
0.235464	0.319647
0.060905	0.587063
0.093957	0.254973
0.063356	0.540029
0.014081	0.699704
0.052223	0.254205
0.000262	0.188231
0.10409	0.0398557
0.095346	0.270821
0.126302	0.178339
0.023696	0.00192405
0.108799	0.0250566
0.00628	0.188633
0.035808	0.0342634
0.102218	0.0169661
0.020093	0.00265688
0.023901	0.571524
0.010768
0.03668
0.104743

## Sheet: 1H
Piezo1 Polarity
Not Treated	SDF1α
0.130585	0.619985
0.262729	0.440183
0.231491	0.523145
0.14515	0.656143
	0.518641

## Sheet: 2B
	SDtime (nm)					log10 (Tension pN/µm)
Probability	Control	Chemokine			Probability	Control	Chemokine
0.25	0	0			0.1	0	0
0.75	0	0			0.3	0	0
1.25	0.01466	0.07407			0.5	0.00435	0
1.75	0.05279	0.18025			0.7	0	0
2.25	0.08504	0.28889			0.9	0	0
2.75	0.15249	0.26914			1.1	0.02174	0
3.25	0.19648	0.11358			1.3	0.02609	0
3.75	0.20821	0.05432			1.5	0.08261	0
4.25	0.1437	0.01235			1.7	0.16087	0.01293
4.75	0.05279	0.00247			1.9	0.23043	0.09483
5.25	0.03812	0.00494			2.1	0.18261	0.12931
5.75	0.02346	0			2.3	0.16957	0.22845
6.25	0.0088	0			2.5	0.04783	0.24138
6.75	0.00293	0			2.7	0.01304	0.06466
7.25	0.00587	0			2.9	0.01304	0.06897
7.75	0	0			3.1	0.03043	0.09052
8.25	0.00293	0			3.3	0.00435	0.05172
8.75	0.00293	0			3.5	0.0087	0.01293
9.25	0.00587	0			3.7	0.00435	0.00431
9.75	0.00293	0

## Sheet: 2C
Time (min)	Median Tension	Median Absolute Deviation(MAD)
-5	99.518	51.111
1	138.082	69.2584
3	129.48	69.1614
5	125.507	68.8509
6	118.674	63.8365
8	120.544	58.9933
9	100.606	56.8421
11	106.167	55.9247
15	93.5662	51.6845
22	107.531	58.9069
26	101.89	50.8364
30	103.265	54.3869

## Sheet: 2E
Time (min)	Normalized Tension	Normalized Pixel Count (Piezo)
0	0	0
3	0.83	0.37
6	1	0.668
9	0.7	0.71
15	0.67	0.569
26	0.872	0.773
30	0.79	1

## Sheet: 2F
Normalized Tension	Normalized Pixel Count (Piezo)
0	0
0.82875	0.37109
1	0.66817
0.70077	0.70517
0.67122	0.5686
0.87213	0.77305
0.79017	1
0	0.10697
1	1
0.37047	0.81409
0.17702	0
0.43087	0.23144

## Sheet: 3B
pFAK Polarity
Not Treated	CCL19
0.03622	0.040528
0.071086	0.034588
0.068878	0.006273
0.088651	0.027189
0.063502	0.098809
0.01954	0.118445
0.0704	0.070019
0.016956	0.074283
0.068523	0.015056
0.016456	0.041773
0.149765	0.046675
0.109533	0.12428
0.033142	0.018968
0.132098	0.05951
0.091845	0.020405
0.094484	0.237487
0.039964	0.12525
0.016389	0.031041
0.063825	0.070415
0.090646	0.080751
0.02256	0.04158
0.042465	0.043607
0.146284	0.067788
0.052601	0.091152
0.066162	0.05685
0.064048	0.01557
0.125549	0.068181
0.088838	0.012659
0.065788	0.073974
0.011748	0.030108
0.054287	0.030805
0.042192	0.006046
0.005849	0.067898
0.074501	0.145639
0.008202	0.000887
0.06285	0.04886
0.137333	0.0323
0.089965	0.051208
0.089137	0.082663
0.046246	0.110764
0.071782	0.039461
0.055721	0.069217
0.147258	0.308855
0.050779	0.065183
0.049235	0.007295
0.13211	0.405618
0.053765	0.080124
0.039622	0.08401
0.042644	0.056441
0.046794	0.07531
0.029543	0.04316
0.029775	0.269122
0.000785	0.49818
0.042647	0.035035
0.050946	0.096939
0.043793	0.579055
0.008313	0.260084
0.070913	0.034924
0.05606	0.725832
0.049858	0.56086
0.056933	0.004399
0.029023	0.157678
0.033972	0.036009
0.014604	0.171362
0.008149	0.109815
0.148515	0.016626
0.100838	0.529211
0.023472	0.03682
0.064041	0.023041
0.303767	0.165582
0.003161	0.002958
0.032163	0.054569
0.037722	0.015247
0.115752	0.329809
0.002561	0.559943
0.098217	0.098546
0.083779	0.352427
0.035365	0.039417
0.012178	0.029644
0.030927	0.218514
0.065698	0.072815
0.118062	0.039467
0.116178	0.022136
0.080505	0.285453
0.134277	0.47726
0.037044	0.269143
0.030817	0.033806
0.012149	0.314974
0.034094	0.028765
0.100173	0.646248
0.000643	0.016856
0.027694	0.080752
0.048644	0.042783
0.010426	0.013966
0.065271	0.384547
0.032277	0.516545
0.024223	0.021563
0.0077	0.003038
0.055713	0.023938
0.028915	0.156869
0.033919	0.025327
0.002212	0.105468
0.161779	0.159807
0.111946	0.5467
0.047013	0.062438
0.022443	0.030361
0.017726	0.118712
0.040602	0.053187
0.077827	0.045432
0.025036	0.016247
0.011905	0.13413
0.043169	0.127182
0.03026	0.007026
0.021854	0.038362
0.106554	0.076267
0.044083	0.033942
0.093148	0.224027
0.032992	0.119451
0.045597	0.052094
0.059538	0.579262
0.012936	0.018248
0.013804	0.063572
	0.143048
	0.058806
	0.046591
	0.01716
	0.104443
	0.032057
	0.067928
	0.055781
	0.057593
	0.199786
	0.152105
	0.087712
	0.161148
	0.077904
	0.151848
	0.007975
	0.051037
	0.097721
	0.002583
	0.122351
	0.032456
	0.039077
	0.027883
	0.106406
	0.208664
	0.102948
	0.146535
	0.003365
	0.021827
	0.078571
	0.06664
	0.274296
	0.073029
	0.186801
	0.024192
	0.400012
	0.007664
	0.116734
	0.057052
	0.024372
	0.069934
	0.066184
	0.025789
	0.056802
	0.129612
	0.084969
	0.039052
	0.084047
	0.066324
	0.108585
	0.041021
	0.061565
	0.252393
	0.098653
	0.005741
	0.131108
	0.027421
	0.003986
	0.125537
	0.078024
	0.072872
	0.046113
	0.230573
	0.089237
	0.047061
	0.008989
	0.131739
	0.459166
	0.050092
	0.222332
	0.675236
	0.111468
	0.015585
	0
	0.103089
	0

[truncated: 30 more sheets: 3D, 3F, 3H, 3J, 4B, 4C, 4D, 4G, 4H, 5B, 5D, 5E, 6C, 6D, 6E, Fig 1-fig supplement 1A, Fig 1-fig supplement 1B, Fig 1-fig supplement 1E, Fig 1-fig supplement 1F, Fig 1- fig supplement 1H …]
